# Supplementary material
Source: PubMed Central journal article supplement (PMC5177487)
Supplement: NIHMS826732-supplement-Supplementary_Material.pdf [file NIHMS826732-supplement-Supplementary_Material.pdf]

**TABLE S1.** Biomarkers in Alzheimer's disease patients.

| Patient No. <sup>a</sup> | Amyloid Imaging <sup>b</sup> | CSF Biomarkers                                                                                            | Brain MRI                                                                          |
|--------------------------|------------------------------|-----------------------------------------------------------------------------------------------------------|------------------------------------------------------------------------------------|
| 1                        | Positive                     | A $\beta$ 42=129 <sup>d</sup><br>t-Tau=243 <sup>d</sup><br>p-Tau=55 <sup>d</sup>                          | L > R parietal atrophy                                                             |
| 2                        | Positive                     | –                                                                                                         | Bilateral hippocampal atrophy and L > R occipital and parietal atrophy             |
| 3                        | Positive                     | A $\beta$ 42=294.0<br>t-Tau=833.7<br>p-Tau=113.6 <sup>c</sup><br>A $\beta$ 42-Tau Index=0.24 <sup>c</sup> | R > L hippocampal atrophy and diffuse cortical atrophy with posterior predominance |
| 4                        | Positive                     | A $\beta$ 42=182.7<br>t-Tau=528.5<br>p-Tau=90.0 <sup>c</sup><br>A $\beta$ 42-Tau Index=0.21 <sup>c</sup>  | Bilateral parietal atrophy                                                         |
| 5                        | Positive                     | –                                                                                                         | Diffuse cortical atrophy with posterior predominance                               |
| 6                        | Positive                     | –                                                                                                         | Global atrophy                                                                     |

|    |          |                                                                                  |                                                                                                          |
|----|----------|----------------------------------------------------------------------------------|----------------------------------------------------------------------------------------------------------|
| 7  | -        | -                                                                                | Bilateral parietal atrophy                                                                               |
| 8  | Positive | -                                                                                | L > R hippocampal and parietal atrophy, white matter changes consistent with cerebral amyloid angiopathy |
| 9  | Positive | -                                                                                | L > R hippocampal, occipital, and parietal atrophy                                                       |
| 10 | Positive | -                                                                                | L > R parietal atrophy                                                                                   |
| 11 | Positive | -                                                                                | Diffuse atrophy predominantly in the hippocampi and posterior cortex                                     |
| 12 | -        | A $\beta$ 42=399.3<br>t-Tau=441.8<br>p-Tau=68.6°<br>A $\beta$ 42-Tau Index=0.52° | R > L hippocampal and parietal atrophy                                                                   |
| 13 | Positive | -                                                                                | Bilateral parietal atrophy with posterior predominance                                                   |
| 14 | Positive | -                                                                                | Diffuse cortical atrophy with L > R parietal atrophy                                                     |

|                 |          |                                                                         |                                                                                                             |
|-----------------|----------|-------------------------------------------------------------------------|-------------------------------------------------------------------------------------------------------------|
| 15 <sup>e</sup> | –        | –                                                                       | Bilateral hippocampal and parietal atrophy                                                                  |
| 16              | Positive | –                                                                       | Bilateral hippocampal atrophy and R > L posterior cortical atrophy                                          |
| 17              | Positive | Aβ42=143 <sup>d</sup><br>t-Tau=71 <sup>d</sup><br>p-Tau=18 <sup>d</sup> | Hippocampal atrophy and diffuse cortical atrophy most prominent in the L > R occipital and parietal lobes   |
| 18              | –        | –                                                                       | L > R hippocampal atrophy and diffuse cortical atrophy                                                      |
| 19              | Positive | –                                                                       | Generalized atrophy, most prominent in L > R hippocampal and parietal regions                               |
| 20              | Positive | –                                                                       | Bilateral hippocampal and parietal atrophy                                                                  |
| 21              | Positive | –                                                                       | Bilateral atrophy of temporoparietal junction with particular involvement of supramarginal and angular gyri |
| 22 <sup>e</sup> | –        | –                                                                       | R > L hippocampal atrophy and diffuse cortical atrophy most prominent in bilateral dorsal parietal regions  |

|    |          |                                                                                                           |                                                                                    |
|----|----------|-----------------------------------------------------------------------------------------------------------|------------------------------------------------------------------------------------|
| 23 | -        | -                                                                                                         | Bilateral hippocampal and parietal atrophy                                         |
| 24 | -        | -                                                                                                         | Bilateral hippocampal atrophy                                                      |
| 25 | -        | A $\beta$ 42=399.5<br>t-Tau=527.6<br>p-Tau=70.5 <sup>c</sup><br>A $\beta$ 42-Tau Index=0.46 <sup>c</sup>  | Bilateral hippocampal atrophy and L > R parietal atrophy                           |
| 26 | -        | A $\beta$ 42=125.0<br>t-Tau=559.4<br>p-Tau= 82.0 <sup>c</sup><br>A $\beta$ 42-Tau Index=0.14 <sup>c</sup> | Bilateral hippocampal atrophy                                                      |
| 27 | Positive | -                                                                                                         | L > R hippocampal atrophy and diffuse cerebral atrophy with posterior predominance |
| 28 | -        | A $\beta$ 42=210.3<br>t-Tau=504.3<br>p-Tau=79.8 <sup>c</sup><br>A $\beta$ 42-Tau Index=0.25 <sup>c</sup>  | L > R parietal atrophy                                                             |
| 29 | -        | -                                                                                                         | L > R parietal atrophy                                                             |

|                 |          |   |                                                                                        |
|-----------------|----------|---|----------------------------------------------------------------------------------------|
| 30 <sup>e</sup> | –        | – | Bilateral hippocampal atrophy and diffuse cortical atrophy with posterior predominance |
| 31              | Positive | – | R > L parietal atrophy                                                                 |
| 32              | Positive | – | Bilateral parietal atrophy                                                             |
| 33              | –        | – | Bilateral hippocampal and parietal atrophy                                             |

<sup>a</sup>Patients 1–14 had subclinical epileptiform activity.

<sup>b</sup>Positron emission tomography agent was <sup>18</sup>F-AV-45 for patients 3, 4, 6, and 32, and <sup>11</sup>C-Pittsburgh compound B for the remainder of the patients.

<sup>c</sup>Values supporting a diagnosis of Alzheimer’s disease were p-Tau level >61 pg/ml and Aβ42-Tau Index <1.0 (Athena Diagnostics).

<sup>d</sup>Values supporting a diagnosis of Alzheimer’s disease were Aβ42 level <192 pg/ml, t-Tau level >93 pg/ml, and p-Tau level >23 pg/ml (Alzheimer’s Disease Neuroimaging Initiative Biomarker Core at the University of Pennsylvania)<sup>1</sup>.

<sup>e</sup>Alzheimer’s disease was confirmed by autopsy according to National Institute on Aging–Reagan Institute criteria<sup>2</sup>.

Aβ42 = amyloid-β peptide ending in amino acid residue 42; CSF = cerebrospinal fluid; L = left; MRI = magnetic resonance imaging; p-Tau = tau phosphorylated at threonine 181; R = right; t-Tau = total tau.

**TABLE S2.** Distribution and frequency of epileptiform activity in Alzheimer's disease patients.

| Patient No. | Diagnosis   | H | LTM-EEG                             |                                |                 | M/EEG                 |                    |                 |
|-------------|-------------|---|-------------------------------------|--------------------------------|-----------------|-----------------------|--------------------|-----------------|
|             |             |   | EPILEPTIFORM ACTIVITY               |                                |                 | EPILEPTIFORM ACTIVITY |                    |                 |
|             |             |   | Lead Localization                   | Predominant Region             | Events per Hour | Modality <sup>a</sup> | Predominant Region | Events per Hour |
| 1           | AD-Language | R | T5 > T3                             | L Temporal                     | 0.15            | MEG > EEG             | L Temporal         | 5               |
| 2           | AD-PCA      | R | C3                                  | L Central                      | 0.03            | MEG                   | R Parietal         | 2               |
| 3           | AD          | R | F4 > Cz > F3 > C3<br>> F7 > FP1     | R Frontal                      | 5.18            | EEG > MEG             | R Frontal          | 1               |
| 4           | AD          | L | T3 > T5                             | L Temporal                     | 0.24            | MEG > EEG             | Bilateral Temporal | 7               |
| 5           | AD          | R | C3 > F3                             | L Central                      | 1.51            | –                     | –                  | –               |
| 6           | AD          | R | Fp1, Fp2, F3, and<br>F4 > T3 and T4 | Bilateral-Frontal-<br>Temporal | 0.39            | –                     | –                  | –               |
| 7           | AD-PCA      | R | T3 > F3 > F4                        | L Temporal                     | 0.21            | –                     | –                  | –               |
| 8           | AD          | R | –                                   | –                              | –               | MEG                   | R Central          | 20              |

|    |             |   |   |   |   |             |                                              |   |
|----|-------------|---|---|---|---|-------------|----------------------------------------------|---|
| 9  | AD-PCA      | R | – | – | – | MEG and EEG | R Temporal                                   | 4 |
| 10 | AD-Language | L | – | – | – | MEG         | R Temporal                                   | 1 |
| 11 | AD          | R | – | – | – | MEG         | R Temporal                                   | 5 |
| 12 | AD          | R | – | – | – | MEG         | R Temporal-<br>Parietal-Posterior<br>Insular | 9 |
| 13 | AD-PCA      | R | – | – | – | MEG and EEG | R Central-Parietal                           | 2 |
| 14 | AD          | R | – | – | – | MEG         | L Peri-rolandic<br>and Posterior<br>Insular  | 2 |

<sup>a</sup>Modality indicates the neurophysiological monitoring system on which epileptiform activity was observed, and the > sign indicates that the epileptiform activity was more distinct on one of the modalities.

AD = Alzheimer's disease; AD-Language = Alzheimer's disease with predominantly language symptoms; AD-PCA = Alzheimer's disease with posterior cortical atrophy and predominantly visuospatial symptoms; H = handedness; L = left; EEG = electroencephalography; LTM-EEG = long-term monitoring with video-electroencephalography; MEG = magnetoencephalography; M/EEG = magnetoencephalography with simultaneous electroencephalography; R = right.

**TABLE S3.** Background slowing on long-term monitoring with video-EEG.

| <b>Slowing</b> | <b>Controls<br/>(n = 19)</b> | <b>AD<br/>Patients<br/>(n = 33)</b> | <b><i>p</i><sup>a</sup></b> | <b>AD without<br/>Epileptiform<br/>Activity (n = 26)</b> | <b>AD with<br/>Epileptiform<br/>Activity (n = 7)</b> | <b><i>p</i><sup>a</sup></b> |
|----------------|------------------------------|-------------------------------------|-----------------------------|----------------------------------------------------------|------------------------------------------------------|-----------------------------|
| None           | 15 (78.9%)                   | 19 (57.6%)                          | 0.12                        | 15 (57.7%)                                               | 4 (57.1%)                                            | 1.0                         |
| Generalized    | 1 (5.3%)                     | 10 (30.3%)                          | 0.04                        | 9 (34.6%)                                                | 1 (14.3%)                                            | 0.40                        |
| Asymmetric     | 1 (5.3%)                     | 3 (9.1%)                            | 1.0                         | 1 (3.8%)                                                 | 2 (28.6%)                                            | 0.11                        |
| Focal          | 2 (10.5%)                    | 1 (3.0%)                            | 0.55                        | 1 (3.8%)                                                 | 0 (0.0%)                                             | 1.0                         |

<sup>a</sup>Statistical tests were Pearson  $\chi^2$  or Fisher exact tests.

**TABLE S4.** Background slowing on magnetoencephalography with simultaneous EEG.

| <b>Slowing</b> | <b>Controls<br/>(n = 19)</b> | <b>AD<br/>Patients<br/>(n = 33)</b> | <b><i>p</i><sup>a</sup></b> | <b>AD without<br/>Epileptiform<br/>Activity (n = 22)</b> | <b>AD with<br/>Epileptiform<br/>Activity (n = 11)</b> | <b><i>p</i><sup>a</sup></b> |
|----------------|------------------------------|-------------------------------------|-----------------------------|----------------------------------------------------------|-------------------------------------------------------|-----------------------------|
| None           | 17 (89.5%)                   | 10 (30.3%)                          | < 0.0001                    | 9 (40.9%)                                                | 1 (9.1%)                                              | 0.11                        |
| Generalized    | 0 (0.0%)                     | 14 (42.4%)                          | 0.0009                      | 9 (40.9%)                                                | 5 (45.5%)                                             | 1.0                         |
| Asymmetric     | 1 (5.3%)                     | 7 (21.2%)                           | 0.23                        | 3 (13.6%)                                                | 4 (36.4%)                                             | 0.19                        |
| Focal          | 1 (5.3%)                     | 2 (6.1%)                            | 1.0                         | 1 (4.5%)                                                 | 1 (9.1%)                                              | 1.0                         |

Readings combine findings from magnetoencephalography and simultaneous EEG recordings.

<sup>a</sup>Statistical tests were Pearson  $\chi^2$  or Fisher exact tests.



**TABLE S5.** Neuropsychological test performance of Alzheimer’s disease patients and age-matched controls.

|                                                                             | <b>AD without<br/>Epileptiform<br/>Activity<br/>(n = 12–19)</b> | <b>AD with<br/>Epileptiform<br/>Activity<br/>(n = 7–14)</b> | <b>Controls<br/>(n = 16–19)</b> |
|-----------------------------------------------------------------------------|-----------------------------------------------------------------|-------------------------------------------------------------|---------------------------------|
| <b><u>Global Cognitive Performance<br/>and Function</u></b>                 |                                                                 |                                                             |                                 |
| <b>MMSE<sup>3</sup></b>                                                     | 21.0 (16.0–24.0)                                                | 22.5 (18.8–24.0)                                            | 29.6 (29.0–30.0)                |
| <b>CDR<sup>4</sup></b>                                                      | 1.0 (1.0–2.0)                                                   | 1.0 (0.5–1.0)                                               | 0.0 (0.0 – 0.0)                 |
| <b>CDR-SOB<sup>4</sup></b>                                                  | 5.0 (4.5–8.0)                                                   | 4.8 (4.0–7.0)                                               | 0.0 (0.0 – 0.0)                 |
| <b><u>Episodic Memory</u></b>                                               |                                                                 |                                                             |                                 |
| <b>Visual free recall (Benson 10<br/>minutes)<sup>5</sup></b>               | 2.0 (0.0–4.3)                                                   | 2.5 (0.3–7.5)                                               | 12.7 (11.0–15.0)                |
| <b>Short-delay verbal free recall<br/>(CVLT)<sup>6</sup></b>                | 3.1 ± 1.9<br>(of 9 possible)                                    | 3.5 ± 2.4<br>(of 9 possible)                                | 11.1 ± 2.8<br>(of 16 possible)  |
| <b>Long-delay verbal free recall<br/>(CVLT)<sup>6</sup></b>                 | 0.5 (0.0–3.0)<br>(of 9 possible)                                | 1.0 (0.0–3.5)<br>(of 9 possible)                            | 11.9 ± 3.5<br>(of 16 possible)  |
| <b><u>Executive Function &amp; Working<br/>Memory</u></b>                   |                                                                 |                                                             |                                 |
| <b>Design fluency<sup>7</sup></b>                                           | 4.5 (3.3–7.0)                                                   | 6.5 (2.0–9.0)                                               | 12.7 ± 4.4                      |
| <b>Information processing speed<br/>(Stroop color naming)<sup>8,9</sup></b> | 49.1 ± 27.5                                                     | 51.3 ± 24.6                                                 | 91.5 ± 12.0                     |
| <b>Cognitive control (Stroop<br/>inhibition)<sup>8,9</sup></b>              | 17.0 (6.8–25.3)                                                 | 11.0 (5.0–32.0)                                             | 55.1 ± 11.0                     |
| <b>Verbal working memory (Digit<br/>span forward)<sup>10</sup></b>          | 5.0 (4.0–5.0)                                                   | 5.0 (4.0–7.0)                                               | 7.3 ± 1.5                       |
| <b>Attention (Digit span backward)<sup>10</sup></b>                         | 3.0 (2.0–3.3)                                                   | 3.0 (3.0–3.3)                                               | 5.8 (5.0–7.0)                   |
| <b>Set shifting (Modified trails –<br/>speed)<sup>10</sup></b>              | 0.07 (0.02–0.31)                                                | 0.14 (0.04–0.4)                                             | 0.7 ± 0.3                       |

|                                                                            |                                |                                |                                |
|----------------------------------------------------------------------------|--------------------------------|--------------------------------|--------------------------------|
| <b>Verbal learning</b> (CVLT total score) <sup>6</sup>                     | 16.7 ± 5.9<br>(of 36 possible) | 16.1 ± 5.2<br>(of 36 possible) | 51.9 ± 9.7<br>(of 80 possible) |
| <b><u>Language</u></b>                                                     |                                |                                |                                |
| <b>Reading of 6 irregular words</b>                                        | 6.0 (5.8–6.0)                  | 6.0 (4.0–6.0)                  | 6.0 (6.0–6.0)                  |
| <b>Syntax comprehension</b> <sup>11</sup>                                  | 3.2 ± 1.4                      | 3.1 ± 1.3                      | 4.8 (4.5–5.0)                  |
| <b>Verbal agility</b> (correct repetitions of multisyllabic word in 5 sec) | 5.0 (3.0–6.0)                  | 4.0 (2.0–6.0)                  | 5.9 (6.0–6.0)                  |
| <b>Boston Naming Test</b> <sup>12,13</sup>                                 | 12.2 ± 2.5                     | 11.6 ± 3.2                     | 14.6 (14.0–15.0)               |
| <b>Lexical fluency</b> (D words/1 minute) <sup>14,15</sup>                 | 8.7 ± 5.1                      | 10.3 ± 4.7                     | 17.4 ± 6.8                     |
| <b>Category fluency</b> (Animals/1 minute) <sup>14,15</sup>                | 10.8 ± 5.5                     | 9.6 ± 4.9                      | 22.4 ± 5.0                     |
| <b>Repetition of 5 phonemically complex sentences</b>                      | 3.5 (2.0–5.0)                  | 4.0 (1.5–4.5)                  | 4.8 (5.0–5.0)                  |
| <b><u>Visuospatial Function</u></b>                                        |                                |                                |                                |
| <b>Face discrimination</b> (CATS – face matching) <sup>16</sup>            | 11.5 (10.0–12.0)               | 11.0 (9.0–12.0)                | 11.5 (11.5–12.0)               |
| <b>Visuoconstruction</b> (Benson copy) <sup>5</sup>                        | 14.0 (4.0–15.0)                | 13.0 (4.0–14.0)                | 15.3 (14.0–16.0)               |
| <b>Location discrimination</b> (VOSP number location) <sup>17</sup>        | 5.7 ± 2.4                      | 5.4 ± 2.9                      | 8.9 (8.0–10.0)                 |
| <b>Calculations</b> <sup>10</sup>                                          | 2.8 ± 1.5                      | 2.5 ± 1.1                      | 4.7 (5.0–5.0)                  |
| <b>Emotion naming</b> (CATS – affect naming) <sup>16</sup>                 | 12.0 (11.0–13.0)               | 12.0 (9.8–13.0)                | 12.3 ± 1.8                     |

Data represent means ± SD or medians with interquartile ranges in parentheses.

AD = Alzheimer’s disease; MMSE = Mini-Mental State Examination; CDR = Clinical Dementia Rating; CDR-SOB = CDR Sum of Boxes; CVLT = California Verbal Learning Test containing nine items for AD patients and 16 items for controls; CATS = Comprehensive Affect Testing System; VOSP = Visual Object and Space Perception.

**TABLE S6.** Longitudinal changes in Mini-Mental State Examination (MMSE) scores in Alzheimer’s disease patients with or without epileptiform activity.

| <b>Patient No.</b> | <b>Epileptiform Activity?</b> | <b>Visit Time (Months)</b> | <b>MMSE</b> |
|--------------------|-------------------------------|----------------------------|-------------|
| 1                  | Yes                           | 0.0                        | 28          |
|                    |                               | 12.4                       | 27          |
|                    |                               | 26.0                       | 24          |
|                    |                               | 41.2                       | 5           |
|                    |                               | 53.4                       | 3           |
| 2                  | Yes                           | 0.0                        | 18          |
|                    |                               | 4.4                        | 17          |
|                    |                               | 12.5                       | 17          |
|                    |                               | 27.4                       | 13          |
|                    |                               | 44.0                       | 5           |
| 3                  | Yes                           | 0.0                        | 26          |
| 4                  | Yes                           | 0.0                        | 24          |
| 5                  | Yes                           | 0.0                        | 23          |
|                    |                               | 17.4                       | 20          |
|                    |                               | 80.4                       | 0           |
| 6                  | Yes                           | 0.0                        | 23          |
|                    |                               | 1.7                        | 20          |
|                    |                               | 14.4                       | 21          |
| 7                  | Yes                           | 0.0                        | 17          |
| 8                  | Yes                           | 0.0                        | 19          |
| 9                  | Yes                           | 0.0                        | 15          |
|                    |                               | 12.3                       | 11          |
| 10                 | Yes                           | 0.0                        | 26          |
|                    |                               | 13.4                       | 24          |
|                    |                               | 26.7                       | 20          |
|                    |                               | 40.2                       | 4           |
| 11                 | Yes                           | 0.0                        | 23          |
|                    |                               | 25.8                       | 9           |
| 12                 | Yes                           | 0.0                        | 17          |

|    |     |      |    |
|----|-----|------|----|
|    |     | 11.7 | 16 |
| 13 | Yes | 0.0  | 26 |
|    |     | 13.8 | 20 |
|    |     | 27.5 | 25 |
|    |     | 45.7 | 16 |
|    |     | 96.5 | 1  |
| 14 | Yes | 0.0  | 26 |
|    |     | 12.7 | 22 |
|    |     | 29.7 | 25 |
| 15 | No  | 0.0  | 29 |
|    |     | 12.9 | 26 |
|    |     | 25.8 | 25 |
|    |     | 37.1 | 22 |
|    |     | 47.6 | 20 |
|    |     | 59.6 | 20 |
|    |     | 75.7 | 15 |
| 16 | No  | 0.0  | 23 |
|    |     | 5.2  | 26 |
|    |     | 21.4 | 22 |
|    |     | 35.4 | 17 |
|    |     | 55.1 | 10 |
| 17 | No  | 0.0  | 27 |
|    |     | 14.3 | 26 |
|    |     | 32.5 | 26 |
|    |     | 44.6 | 19 |
|    |     | 69.9 | 9  |
| 18 | No  | 0.0  | 29 |
|    |     | 12.2 | 29 |
|    |     | 24.8 | 27 |
|    |     | 38.3 | 27 |
|    |     | 50.8 | 28 |
|    |     | 64.0 | 25 |
| 19 | No  | 0.0  | 25 |
|    |     | 12.2 | 21 |

|    |    |      |    |
|----|----|------|----|
|    |    | 29.0 | 13 |
| 20 | No | 0.0  | 17 |
|    |    | 12.0 | 11 |
| 21 | No | 0.0  | 24 |
|    |    | 4.9  | 26 |
|    |    | 17.3 | 25 |
|    |    | 26.7 | 22 |
| 22 | No | 0.0  | 23 |
|    |    | 4.2  | 22 |
| 23 | No | 0.0  | 23 |
|    |    | 19.5 | 22 |
|    |    | 19.7 | 21 |
| 24 | No | 0.0  | 17 |
| 25 | No | 0.0  | 22 |
|    |    | 10.2 | 27 |
|    |    | 22.4 | 29 |
|    |    | 35.3 | 28 |
| 26 | No | 0.0  | 23 |
|    |    | 17.5 | 22 |
|    |    | 28.1 | 18 |
| 27 | No | 0.0  | 15 |
| 28 | No | 0.0  | 21 |
| 29 | No | 0.0  | 24 |
|    |    | 13.8 | 28 |
| 30 | No | 0.0  | 16 |
|    |    | 20.6 | 16 |
| 31 | No | 0.0  | 21 |
|    |    | 14.1 | 21 |
| 32 | No | 0.0  | 24 |
| 33 | No | 0.0  | 26 |
|    |    | 75.6 | 14 |
|    |    | 83.5 | 14 |

## REFERENCES FOR SUPPLEMENTARY TABLES

1. Shaw LM, Vanderstichele H, Knapik-Czajka M, et al. Cerebrospinal fluid biomarker signature in Alzheimer's disease neuroimaging initiative subjects. *Ann Neurol* 2009;65:403-13.
2. Consensus recommendations for the postmortem diagnosis of Alzheimer's disease. The National Institute on Aging, and Reagan Institute Working Group on Diagnostic Criteria for the Neuropathological Assessment of Alzheimer's Disease. *Neurobiol Aging* 1997;18:S1-2.
3. Folstein MF, Folstein SE, McHugh PR. "Mini-mental state". A practical method for grading the cognitive state of patients for the clinician. *J Psychiatr Res* 1975;12:189-98.
4. Morris JC. The Clinical Dementia Rating (CDR): current version and scoring rules. *Neurology* 1993;43:2412-4.
5. Possin KL, Laluz VR, Alcantar OZ, et al. Distinct neuroanatomical substrates and cognitive mechanisms of figure copy performance in Alzheimer's disease and behavioral variant frontotemporal dementia. *Neuropsychologia* 2011;49:43-8.
6. Delis DC, Kramer JH, Kaplan E, Ober BA. California Verbal Learning Test. Second ed. San Antonio, TX: The Psychological Corporation; 2000.
7. Delis DC, Kaplan E, Kramer JH. Delis-Kaplan Executive Function System. San Antonio, TX: The Psychological Corporation; 2001.
8. Golden CJ, Freshwater SM. Stroop Color and Word Test: Revised examiner's manual. Wood Dale, IL: Stoelting Co.; 2002.
9. Golden CJ. Stroop Color and Word Test: A manual for clinical and experimental uses. Chicago, IL: Stoelting Co.; 1978.
10. Kramer JH, Jurik J, Sha SJ, et al. Distinctive neuropsychological patterns in frontotemporal dementia, semantic dementia, and Alzheimer disease. *Cogn Behav Neurol* 2003;16:211-8.

11. Goodglass H, Kaplan E, Barresi B. Boston Diagnostic Aphasia Examination. Third ed. Philadelphia, PA: Lippincott Williams and Wilkins.; 2001.
12. Kaplan EF, .Goodglass H, Weintraub S. The Boston Naming Test. Second ed. Philadelphia, PA: Lippincott Williams and Wilkins; 2001.
13. Mack WJ, Freed DM, Williams BW, Henderson VW. Boston Naming Test: shortened versions for use in Alzheimer's disease. J Gerontol 1992;47:P154-8.
14. Benton AL, Hamsher KD, Sivan AB. Multilingual Aphasia Examination. Third ed. San Antonio, TX: The Psychological Corporation; 1994.
15. Spreen O, Benton AL. Neurosensory center comprehensive examination for aphasia. Victoria, BC: Neuropsychology Laboratory, Department of Psychology, University of Victoria; 1977.
16. Froming KB, Levy CM, Schaffer SG, Ekman P. Comprehensive Affect Testing System. Gainesville, FL: Psychology Software, Inc.; 2006.
17. Warrington EK, James M. The Visual Object and Space Perception battery. Bury St. Edmunds, Suffolk, England: Thames Valley Test Company; 1991.
